# Supplementary material for: The Healthy Food Environment Policy Index in Poland: Implementation Gaps and Actions for Improvement
Source: Foods. 2022 Jun 2;11(11):1648. doi: 10.3390/foods11111648 (PMC9180244; doi:10.3390/foods11111648)
Supplement: Supplementary file 1 [file foods-11-01648-s001.zip › File 3 Evidence Document.xlsx]

## Sheet: Explanatory Information
Data Sources
Official government documents and legal acts of the Republic of Poland obtained form the on-line repository of the legal acts of Republic of Poland (https://isap.sejm.gov.pl/); web pages of relevant Ministries and government agencies, NGO's and other stakeholders.
Data labels (according to Food EPI tool):	Domains included in Food EPI tool
COMP	DOMAIN 1 - FOOD COMPOSITION
LABEL	DOMAIN 2 - FOOD LABELLING
PROMO	DOMAIN 3 - FOOD PROMOTION
PRICES	DOMAIN 4 - FOOD PRICES
PROV	DOMAIN 5 - FOOD PROVISION
RETAIL	DOMAIN 6 - FOOD IN RETAIL
TRADE	DOMAIN 7 - TRADE AND INVESTMENT
LEAD	DOMAIN 8 - LEADERSHIP
GOVER	DOMAIN 9 - GOVERNANCE
MONIT	DOMAIN 10 - MONITORING AND INTELLIGENCE
FUND	DOMAIN 11 - FUNDING AND RESOURCES
PLATF	DOMAIN 12 - PLATFORMS AND INTERACTIONS
HIAP	DOMAIN 13 - HEALTH IN ALL POLICIES
Numbers attributed to specific indicators are in line with the numbers in the original Food EPI tool

## Sheet: Domain 1- food composition
Food-EPI Indicator label	Food-EPI Indicator definition	Translation into Polish	National Aspect
COMP 1	Food composition targets/standards have been established for processed foods by the government for the content of the nutrients of concern in certain foods or food groups if they are major contributors to population intakes of these nutrients of concern (trans fats and added sugars in processed foods, salt in bread, saturated fat in commercial frying fats)	Cele / normy dotyczące składu produktu dla przetworzonej żywności zostały ustalone przez rząd dla zawartości składników odżywczych będących przedmiotem zainteresowania w niektórych produktach żywnościowych lub grupach produktów spożywczych, jeżeli są one głównymi czynnikami przyczyniającymi się do spożycia tych składników odżywczych przez populacje (tłuszcze trans i dodane cukry w przetworzonej ż…	W Polsce obowiązuje Ustawa z dnia 21grudnia 2000r.o jakości handlowej artykułów rolno-spożywczych (Dz. U. 2001 Nr 5 poz. 44 z późn. zm.), gdzie w art. 15 pkt. 2 zaznaczono, iż "Minister właściwy do spraw rynkow rolnych w dordze rozporządzenia może okreslić inne szczegółowe wymagania w zakresie jakości handlowej niektórych artykułów rolno-spożywczych lub ich grup". Na mocy tej ustawy Minister Roln…
COMP 2	Food composition targets/standards have been established for out-of-home meals in food service outlets by the government for the content of the nutrients of concern in certain foods or food groups if they are major contributors to population intakes of these nutrients of concern (trans fats, added sugars, salt, saturated fat)	Cele / normy dotyczące składu żywności dla posiłków poza domem w punktach gastronomicznych zostały ustalone przez rząd w odniesieniu do zawartości składników odżywczych stanowiących zagrożenie w niektórych produktach żywnościowych lub grupach żywności, jeżeli są one głównymi czynnikami przyczyniającymi się do spożycia tych składników odżywczych przez populację ( tłuszcze trans, dodane cukry, sól,…	W zakładach żywienia zbiorowego skonsutrowano konkretne wytyczne w zakresie żywienia dzieci i młodzieży. Żywienie dzieci i młodzieży w placówkach szkolnych i przedszkolnych musi opierać się na określonych zasadach i spełniać wypracowane przez ekspertów normy i wymagania. Kontrolę nad spełnianiem wymagań z tego zakresu pełnią organy Państwowej Inspekcji Sanitarnej. Minister Zdrowia wydaje stosowne…

## Sheet: Domain 2- food labelling
Food-EPI Indicator label	Food-EPI Indicator definition	Translation into Polish	National Aspect
LABEL 1	Ingredient lists/nutrient declarations	Listy składników / deklaracje żywieniowe dotyczące składników odżywczych	Podstawowe wymagania dotyczące znakowania żywności znajdują się w rozporządzeniu Parlamentu Europejskiego i Rady (UE) nr 1169/2011 z dnia 25 października 2011 r. w sprawie przekazywania konsumentom informacji na temat żywności, zmiany rozporządzeń Parlamentu Europejskiego i Rady (WE) nr 1924/2006 i (WE) nr 1925/2006 oraz uchylenia dyrektywy Komisji 87/250/EWG, dyrektywy Rady 90/496/EWG, dyrektywy…
LABEL 2	Robust, evidence-based regulatory systems are in place for approving/reviewing claims on foods, so that consumers are protected against unsubstantiated and misleading nutrition and health claims.	Istnieją solidne, oparte na dowodach systemy regulacyjne do zatwierdzania / przeglądu oświadczeń dotyczących żywności, aby chronić konsumentów przed bezpodstawnymi i wprowadzającymi w błąd oświadczeniami żywieniowymi i zdrowotnymi.	Używanie oświadczeń żywieniowych jest określone dla pewnych specyfikacji jakie może wykazywać produkt i regulowane przez Rozporządzenie (WE) nr 1924/2006 Parlamentu Europejskiego i Rady z dnia 20 grudnia 2006 r. w sprawie oświadczeń żywieniowych i zdrowotnych dotyczących żywności. Uzupełnione ono zostało jednak przez inne rozporządzenia m.in.: (1) rozporządzenia (WE) nr 116/2010 z dnia 9 lutego 2…
LABEL 3	A single, consistent, interpretive, evidence-informed front-of-pack supplementary nutrition information system, which readily allows consumers to assess a product’s healthiness, is applied to all packaged foods.	Pojedynczy, spójny, interpretacyjny, oparty na dowodach system uzupełniania informacji o wartości odżywczej z przodu opakowania, który pozwala konsumentom łatwo ocenić zdrowotność produktu, jest stosowany do wszystkich pakowanych produktów spożywczych.	W Polsce stosowany był system GDA (Guideline Daily Amount – Wskazane Dzienne Spożycie), a aktualnie wdrożony jest system RWS (Referencyjnej Wartości Spożycia). Etykiety produktów żywnościowych i napojów powinny pokazywać, w głównym polu widzenia, czyli zazwyczaj na frontowej części etykiety/opakowania produktu, w prosty, nie różnicujący sposób przedstawienie (ikonę graficzną), które zapewni konsu…
LABEL 4	A consistent, single, simple, clearly-visible system of labelling the menu boards of all quick service restaurants (i.e. fast food chains) is applied by the government, which allows consumers to interpret the nutrient quality and energy content of foods and meals on sale.	Rząd stosuje spójny, pojedynczy, prosty, wyraźnie widoczny system oznaczania tablic menu wszystkich restauracji szybkiej obsługi (tj. Sieci fast food), który pozwala konsumentom interpretować jakość składników odżywczych i zawartość energetyczną żywności i posiłków w sprzedaży .	W Polsce obowiązkowym jest podawanie do informacji konsumtna ewentualnych alergenów, które mogą się znaleźć w poszczególnych daniach. Obowiązek taki nakłada Od 13 grudnia 2014 r. Rozporządzeniem Parlamentu Europejskiego i Rady nr 1169/2011 z dnia 25 października 2011 r. w sprawie przekazywania konsumentom informacji na temat żywności. Właściciele wszystkich lokali gastronomicznych mają obowiązek …

## Sheet: Domain 3- food promotion
Food-EPI Indicator label	Food-EPI Indicator definition	Translation into Polish	National Aspect
PROMO 1	Effective policies are implemented by the government to restrict exposure and power of promotion of unhealthy foods to children through broadcast media (TV, radio)	Rząd wdraża skuteczne polityki ograniczające narażenie i siłę promocji niezdrowej żywności wśród dzieci za pośrednictwem mediów telewizyjnych (telewizyjnych, radiowych)	Chociaż nie ma konkretnych wymogów ustawowych to w zakresie tym istnieje inicjatywa oddolna- Porozumienie w sprawie rozpowszechniania reklam i wskazań sponsorskich artykułów spożywczych lub napojów zawierających składniki, których obecność w nadmiernych ilościach w codziennej diecie jest niewskazana. Porozumienie nadawców jest inicjatywą o charakterze samoregulacyjnym, które zyskało aprobatę regu…
PROMO 2	Effective policies are implemented by the government to restrict exposure and power of promotion of unhealthy foods to children through non-broadcast media (e.g. Internet, social media, food packaging, sponsorship, outdoor advertising including around schools)	Rząd wdraża skuteczne polityki mające na celu ograniczenie narażenia i siły promocji niezdrowej żywności wśród dzieci za pośrednictwem mediów nienadawczych (np. Internet, media społecznościowe, opakowania żywności, sponsoring, reklama zewnętrzna, w tym wokół szkół)	Brak konkretnych uregulowań krajowych w tym zakresie.
PROMO 3	Effective policies are implemented by the government to ensure that unhealthy foods are not commercially promoted to children in settings where children gather (e.g. preschools, schools, sport and cultural events)	Rząd wdraża skuteczne polityki, aby zapewnić, że niezdrowa żywność nie będzie promowana komercyjnie wśród dzieci w miejscach, w których gromadzą się dzieci (np. Przedszkola, szkoły, wydarzenia sportowe i kulturalne)	W zakładach żywienia zbiorowego skonsutrowano konkretne wytyczne w zakresie żywienia dzieci i młodzieży. Żywienie dzieci i młodzieży w placówkach szkolnych i przedszkolnych musi opierać się na określonych zasadach i spełniać wypracowane przez ekspertów normy i wymagania. Kontrolę nad spełnianiem wymagań z tego zakresu pełnią organy Państwowej Inspekcji Sanitarnej. Minister Zdrowia wydaje stosowne…

## Sheet: Domain 4- food prices
Food-EPI Indicator label	Food-EPI Indicator definition	Translation into Polish	National Aspect
PRICES 1	Taxes or levies on healthy foods are minimised to encourage healthy food choices where possible (e.g. low or no sales tax, excise, value-added or import duties on fruit and vegetables)	Podatki lub opłaty od zdrowej żywności są minimalizowane, aby w miarę możliwości zachęcać do wyboru zdrowej żywności (np. Niski lub zerowy podatek od sprzedaży, akcyza, wartość dodana lub cła przywozowe na owoce i warzywa)	1 kwietnia 2020 r. wejdzie w życie nowa matryca stawek VAT. Obniżeniu ulegnie podatek nakładany na np. zupy, buliony, żywność homogenizowana i dietetyczna. W skład tych pozycji wchodzą również dietetyczne środki spożywcze specjalnego przeznaczenia medycznego (z 8% na 5%), owoce tropikalne i cytrusowe, niektóre orzechy: pistacjowe, migdały, kokosowe (z 8%. na 5%.), ale również pieczywo oraz ciastk…
PRICES 2	Taxes or levies on unhealthy foods (e.g. sugar-sweetened beverages, foods high in nutrients of concern) are in place and increase the retail prices of these foods by at least 10% to discourage unhealthy food choices where possible, and these taxes are reinvested to improve population health	Obowiązują podatki lub opłaty za niezdrową żywność (np. Napoje słodzone cukrem, żywność o dużej zawartości składników odżywczych budzących obawy) i zwiększają ceny detaliczne tych produktów żywnościowych o co najmniej 10%, aby zniechęcić do niezdrowego wyboru żywności tam, gdzie to możliwe, a podatki te są ponownie inwestowane, aby poprawić zdrowie populacji	Wydaje się, że polskim systemie prawa istnieją narzędzia, które mogłbyby być wykorzystawne do podatkowej polityki prozdrowotnej, ale niestety nie są. Szeroko dyskutowana jest wspomniana nowa matryca stawek VAT, która nie jest wolna od wad. Bardzo dyskusyjnym jest ujednolicenie stawek na pieczywo i ciasta niezależnie od rodzaju, co powoduje, że stawki dla chipsów ziemniaczanych i kukurydzianych zo…
PRICES 3	The intent of existing subsidies on foods, including infrastructure funding support (e.g. research and development, supporting markets or transport systems), is to favour healthy rather than unhealthy foods	Celem istniejących dotacji na żywność, w tym wsparcia finansowania infrastruktury (np. Badań i rozwoju, wspierania rynków lub systemów transportu), jest faworyzowanie zdrowej, a nie niezdrowej żywności	Zgodnie z przepisami rozporządzenia Ministra Rolnictwa i Rozwoju Wsi z dnia 29 lipca 2015 r. w sprawie stawek dotacji przedmiotowych dla różnych podmiotów wykonujących zadania na rzecz rolnictwa (Dz. U. poz. 1170, z 2016 r. poz. 1614 oraz z 2017 r. poz. 1470), dotacja na pokrycie kosztów badań może być udzielona organizacji badawczej, która wykonuje badania w sektorze rolnym na rzecz rolnictwa ek…
PRICES 4	The government ensures that food-related income support programs are for healthy foods	Rząd zapewnia, że ​​programy wsparcia dochodów związane z żywnością dotyczą zdrowej żywności	W Polsce realizowane są dwa programy: Program Operacyjny Pomoc Żywnościowa 2014-2020 oraz Wieloletni Rządowy Program "Posiłek w szkole i w domu" na lata 2019-2023. Cel Programu Operacyjnego Pomocy Żywnościowej (dofinansowywany przez UE) to udzielenie wsparcia osobom doświadczającym najgłębszych form ubóstwa poprzez udostępnienie pomocy żywnościowej w formie paczek lub posiłków. Pomoc mogą otrzymy…

## Sheet: domain 5 - food provision
Food-EPI Indicator label	Food-EPI Indicator definition	Translation into Polish	National Aspect
PROV1	The government ensures that there are clear, consistent policies (including nutrition standards) implemented in schools and early childhood education services for food service activities (canteens, food at events, fundraising, promotions, vending machines etc.) to provide and promote healthy food choices.	Rząd gwarantuje istnienie jasnych, spójnych polityk (w tym norm żywieniowych) wdrożonych w szkołach i placówkach edukacji wczesnoszkolnej w zakresie usług gastronomicznych (stołówki, jedzenie na imprezach, pozyskiwanie funduszy, promocje, automaty z żywnością itp.) w celu zapewnienia i promowania zdrowych wyborów żywieniowych.	Rozporządzenie Ministra Zdrowia z dnia 26 lipca 2016 r. w sprawie grup środków spożywczych przeznaczonych do sprzedaży dzieciom i młodzieży w jednostkach systemu oświaty oraz wymagań, jakie muszą spełniać środki spożywcze stosowane w ramach żywienia zbiorowego dzieci i młodzieży w tych jednostkach	wymagania mało restrycyjne, nie spełniają kryteriów uznania za promujące zdrowe żywienie
PROV2	The government ensures that there are clear, consistent policies in other public sector settings for food service activities (canteens, food at events, fundraising, promotions, vending machines, public procurement standards etc.) to provide and promote healthy food choices	Rząd gwarantuje, że w innych sektorach publicznych istnieją jasne, spójne polityki dotyczące działalności gastronomicznej (stołówki, jedzenie na imprezach, pozyskiwanie funduszy, promocje, automaty, standardy zamówień publicznych itp.) służące zapewnieniu i promowaniu zdrowych wyborów żywieniowych.	brak regulacji
PROV3	The Government ensures that there are good support and training systems to help schools and other public sector organisations and their caterers meet the healthy food service policies and guidelines	Rząd gwarantuje, istnienie dobrych systemów wsparcia i szkolenia, aby pomóc szkołom i innym organizacjom sektora publicznego oraz ich firmom cateringowym w przestrzeganiu zasad i wytycznych dotyczących zdrowej żywności	brak regulacji
PROV4	The Government actively encourages and supports private companies to provide and promote healthy foods and meals in their workplaces	Rząd aktywnie zachęca i wspiera prywatne firmy w zapewnianiu i promowaniu zdrowej żywności i posiłków w ich miejscach pracy.	brak regulacji

## Sheet: domain 6 - food in retail
Food-EPI Indicator label	Food-EPI Indicator definition	Translation into Polish	National Aspect
RETAIL1	Zoning laws and policies are robust enough and are being used, where needed, by local governments to place limits on the density or placement of quick serve restaurants or other outlets selling mainly unhealthy foods in communities	Przepisy i polityki dotyczące stref są wystarczająco solidne i są wykorzystywane, w razie potrzeby, przez samorządy lokalne, aby ograniczyć limity zagęszczenia lub rozmieszczenia restauracji szybkiej obsługi lub innych punktów sprzedaży głównie niezdrowej żywności w środowisku lokalnym.	brak regulacji
RETAIL2	Zoning laws and policies are robust enough and are being used, where needed, by local governments to encourage the availability of outlets selling fresh fruit and vegetables	Przepisy i polityki dotyczące stref są wystarczająco solidne i są wykorzystywane, w razie potrzeby, przez samorządy lokalne, aby zwiększyć dostępność punktów sprzedaży świeżych owoców i warzyw	brak regulacji
RETAIL3	The Government ensures existing support systems are in place to encourage food stores to promote the in-store availability of healthy foods and to limit the in-store availability of unhealthy foods	Rząd gwarantuje istnienie systemów wsparcia, aby zachęcić sklepy spożywcze do promowania dostępności zdrowej żywności w sklepie oraz do ograniczenia dostępności niezdrowej żywności w sklepie	brak regulacji (polityka własna sieci handlowych)
RETAIL4	The government ensures existing support systems are in place to encourage food service outlets to increase the promotion and availability of healthy foods and to decrease the promotion and availability of unhealthy foods	Rząd gwarantuje istnienie systemów wsparcia, aby zachęcić punkty usług gastronomicznych do zwiększenia promocji i dostępności zdrowej żywności oraz do zmniejszenia promocji i dostępności niezdrowej żywności	brak regulacji

## Sheet: domain 7 - food trade and inves
Food-EPI Indicator label	Food-EPI Indicator definition	Translation into Polish	National Aspect
TRADE1	The Government undertakes risk impact assessments before and during the negotiation of trade and investment agreements, to identify, evaluate and minimize the direct and indirect negative impacts of such agreements on population nutrition and health	Rząd przeprowadza oceny ryzyka przed negocjacjami umów handlowych i inwestycyjnych oraz w ich trakcie, aby zidentyfikować, ocenić i zminimalizować bezpośredni i pośredni negatywny wpływ takich umów na żywienie ludności i zdrowie	brak szczególnego rodzaju obowiązków dotyczących oceny wpływu umów handlowych na zdrowie. Powszechnym obowiązkiem jest ocena wpływu na środowisko dla nowych inwestycji, jednak kwestia zdrowotna nie jest tam w żaden szczególny sposób eksponowana. Umowy handlowe są przedmiotem oceny o tyle, o ile wymaga tego prawo UE.
TRADE2	The government adopts measures to manage investment and protect their regulatory capacity with respect to public health nutrition.	Rząd stosuje narzędzia służące zarządzaniu inwestycjami i ochronie ich zdolności regulacyjnych w odniesieniu do żywienia zdrowia publicznego.	brak szczególnego rodzaju obowiązków dotyczących oceny wpływu umów handlowych na zdrowie. Powszechnym obowiązkiem jest ocena wpływu na środowisko dla nowych inwestycji, jednak kwestia zdrowotna nie jest tam w żaden szczególny sposób eksponowana. Umowy handlowe są przedmiotem oceny o tyle, o ile wymaga tego prawo UE.

## Sheet: Domain 8 - leadership
Food-EPI Indicator label	Food-EPI Indicator definition	Translation into Polish	National Aspect
LEAD1	There is strong, visible, political support (at the head of government or state/ ministerial level) expressed at both national as well as international level for improving food environments, population nutrition, diet related NCDs and their related inequalities"	Istnieje silne, widoczne wparcie polityczne (na poziomie prezesa Rady Ministrów lub na szczeblu ministerialnym), zarówno na szczeblu krajowym, jak i międzynarodowym, na rzecz poprawy środowiska żywnościowego, żywienia ludności, chorób niezakaźnych związanych z dietą i związanych z nimi nierówności	kwestia żywienia wydaje się pozostawać poza obszarem priorytetowych działań rządowego ośrodka decyzyjnego. Instytucja odpowiedzialna za stymulowanie akcji promocyjnych w dziedzinie zdrowego żywienia ulokowana jest w zewnętrznym ośrodku badawczym i jest finansowana w ramach Narodowego Programu Zdrowia
LEAD2	Clear population intake targets have been established by the government for the nutrients of concern and / or relevant food groups to meet WHO and national recommended dietary intake levels	Rząd określił jasne cele dotyczące spożycia dla składników odżywczych będących przedmiotem zainteresowania i / lub odpowiednich grup żywności, aby spełnić zalecenia WHO i krajowe zalecane poziomy spożycia	Normy żywieniowe w Polsce opracowywane są przez Instytut Żywności i Żywienia i finansowane w ramach Narodowego Programu Zdrowia. Są one zgodne z zaleceniami WHO, EFSA, Instytutu Medycyny USA i z badaniami naukowymi prowadzonymi w Polsce i świecie. Jednakże nie stanowi to odrębnego elementu publicznej polityki żywieniowej.
LEAD3	Clear, interpretive, evidenced-informed food based dietary guidelines have been established and implemented.	Ustalono i wdrożono jasne, nie budzące wątpliwości interpretacyjnych, oparte na dowodach wytyczne dietetyczne i dotyczące żywności.	Wytyczne dietetyczne opracowywane są przez Polskie Towarzystwo Dietetyki i dotyczą konkretnych przypadków osób o specjalnych potrzebach żywieniowych (choroby onkologiczne, żywienie niemowląt itp. Brak wytycznych w polityce publicznej państwa.
LEAD4	There is a comprehensive, transparent, up-to-date implementation plan linked to national needs and priorities, to improve food environments , reduce the intake of the nutrients of concern to meet WHO and national recommended dietary intake levels, and reduce diet-related NCDs	Istnieje kompleksowy, przejrzysty i aktualny plan wdrażania powiązany z krajowymi potrzebami i priorytetami, mający na celu poprawę środowiska żywnościowego, ograniczenie spożycia składników odżywczych będących przedmiotem zainteresowania w celu spełnienia zalecanych przez WHO i krajowych poziomów spożycia oraz zmniejszenia występowania chorób niezakaźnych związanych z dietą	Polityka żywnościowa w Polsce występuje raczej jako element składowy polityki rolnej, lub polityki społecznej, dotycząc osób zagrożonych wykluczeniem społecznym. W pierwszym przypadku koncentruje się na zabezpieczeniu interesu sektora rolnego, jako taka zawierając przy tym elementy zachęty do produkcji żywności nisko przetworzonej i wysokiej jakości. W drugim aspekcie sprowadza się raczej do zabe…

## Sheet: Domain 9 - Governance
Food-EPI Indicator label	Food-EPI Indicator definition	Translation into Polish	National Aspect
GOVER1	There are robust procedures to restrict commercial influences on the development of policies related to food environments where they have conflicts of interest with improving population nutrition	Istnieją solidne procedury ograniczania wpływów komercyjnych na rozwój polityk związanych ze środowiskiem żywnościowym, w których występują konflikty interesów	Istniejące zasady ograniczające oddziaływanie podmiotów komercyjnych wynikają z ogólnych przepisów dot. całej administracji publicznej. W zakresie eliminowania zagrożenia istniejącym konfliktem interesów za wiodące uznaje się następujące regulacje prawne: Ustawa z dnia 21 sierpnia 1997 roku o ograniczeniu prowadzenia działalności gospodarczej przez osoby pełniące funkcje publiczne, Ustawa z dnia …
GOVER2	Policies and procedures are implemented for using evidence in the development of food policies	Wdrożono zasady i procedury wykorzystania dowodów w opracowywaniu polityk żywnościowych	Nie znaleziono dowodów na istnienie polityk i procedur kształtowania polityki środowiska żywienia z zastosowaniem dowodów.
GOVER3	Policies and procedures are implemented for ensuring transparency in the development of food policies	Wdrażane są zasady i procedury zapewniające przejrzystość w opracowywaniu polityk żywnościowych	Przejrzystość stosowanych procedur opiera się o rozwiązania opisane w GOVER1. Nie stwierdzono występowania szczególnych procedur stworzonych z myślą o środowisku żywienia.
GOVER 4	The government ensures public access to comprehensive nutrition information and key documents (e.g. budget documents, annual performance reviews and health indicators) for the public	Rząd zapewnia społeczeństwu publiczny dostęp do kompleksowych informacji o wartości odżywczej i kluczowych dokumentów (np. Dokumentów budżetowych, rocznych przeglądów wyników i wskaźników zdrowotnych)	Dostęp do informacji publicznej podlega uregulowaniu przede wszystkim na gruncie Ustawy o dostępie do informacji publicznej z 6 września 2001. Wspomniany akt prawny nakłada obowiązek udostępniania informacji publicznej na: 1) organy władzy publicznej; 2) organy samorządów gospodarczych i zawodowych; 3) podmioty reprezentujące zgodnie z odrębnymi przepisami Skarb Państwa; 4) podmioty reprezentując…

[truncated: 4 more sheets: Domain 10 - Monitoring and Inte, Domain 11 - Funding resources, Domain 12 - Platforms and inter, Domain 13 - Health in All Polic]
